# Supplementary material for: Brown Marmorated Stink Bug (Halyomorpha halys Stål.) Attack Induces a Metabolic Response in Strawberry (Fragaria × ananassa Duch.) Fruit
Source: MDPI journal article supplement (doi:10.3390/horticulturae7120561), 2021-12-08
Supplement: s1 [file s1]

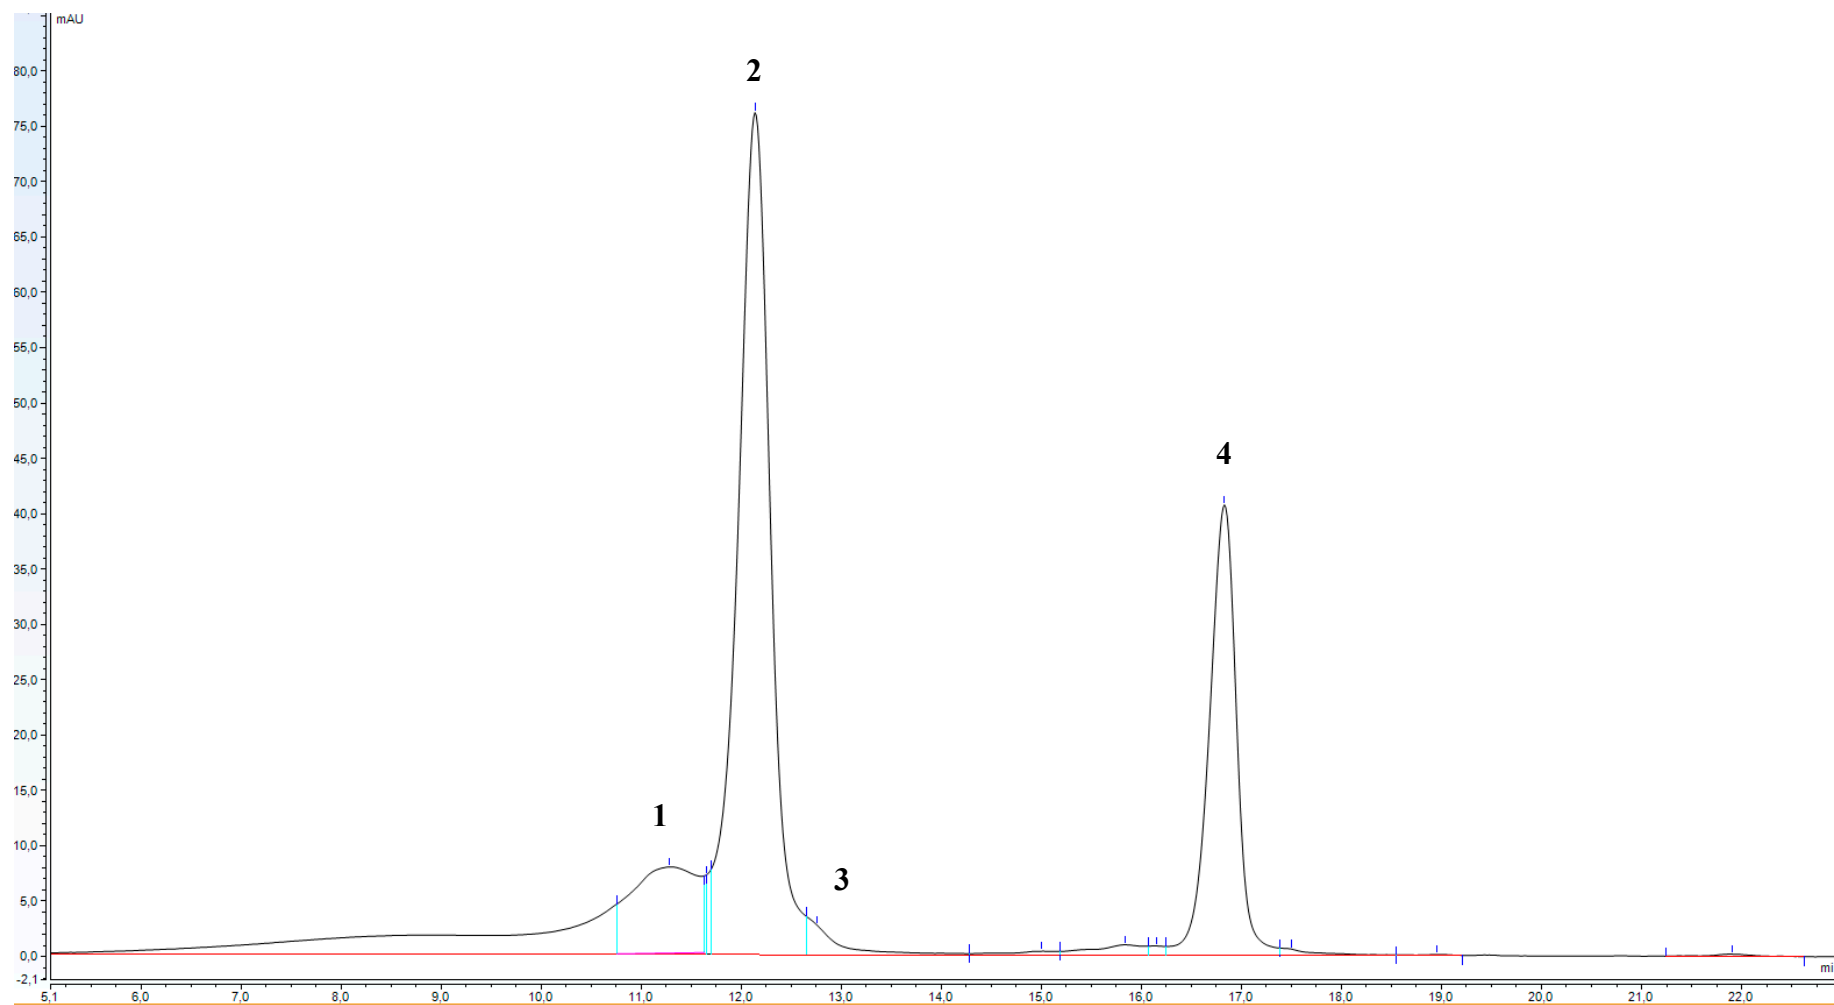

Figure S1: Chromatogram of phenolics at 530 nm wavelength.

Table S1: Individual phenolics identification at 530 nm.

| Peak No. | Phenolic compound               | Rt (min) | [M – H] <sup>–</sup> | MS <sup>2</sup> (m/z) | Ref. |
|----------|---------------------------------|----------|----------------------|-----------------------|------|
| 1        | cyanidin-3-glucoside            | 11.2     | 449                  | 287                   | 1    |
| 2        | pelargonidin-3-glucoside        | 12.1     | 433                  | 271                   | 1    |
| 3        | pelargonidin-3-malonylglucoside | 12.8     | 475                  | 271                   | 1    |
| 4        | pelargonidin-3-rutinoside       | 16.8     | 579                  | 433, 271              | 1    |

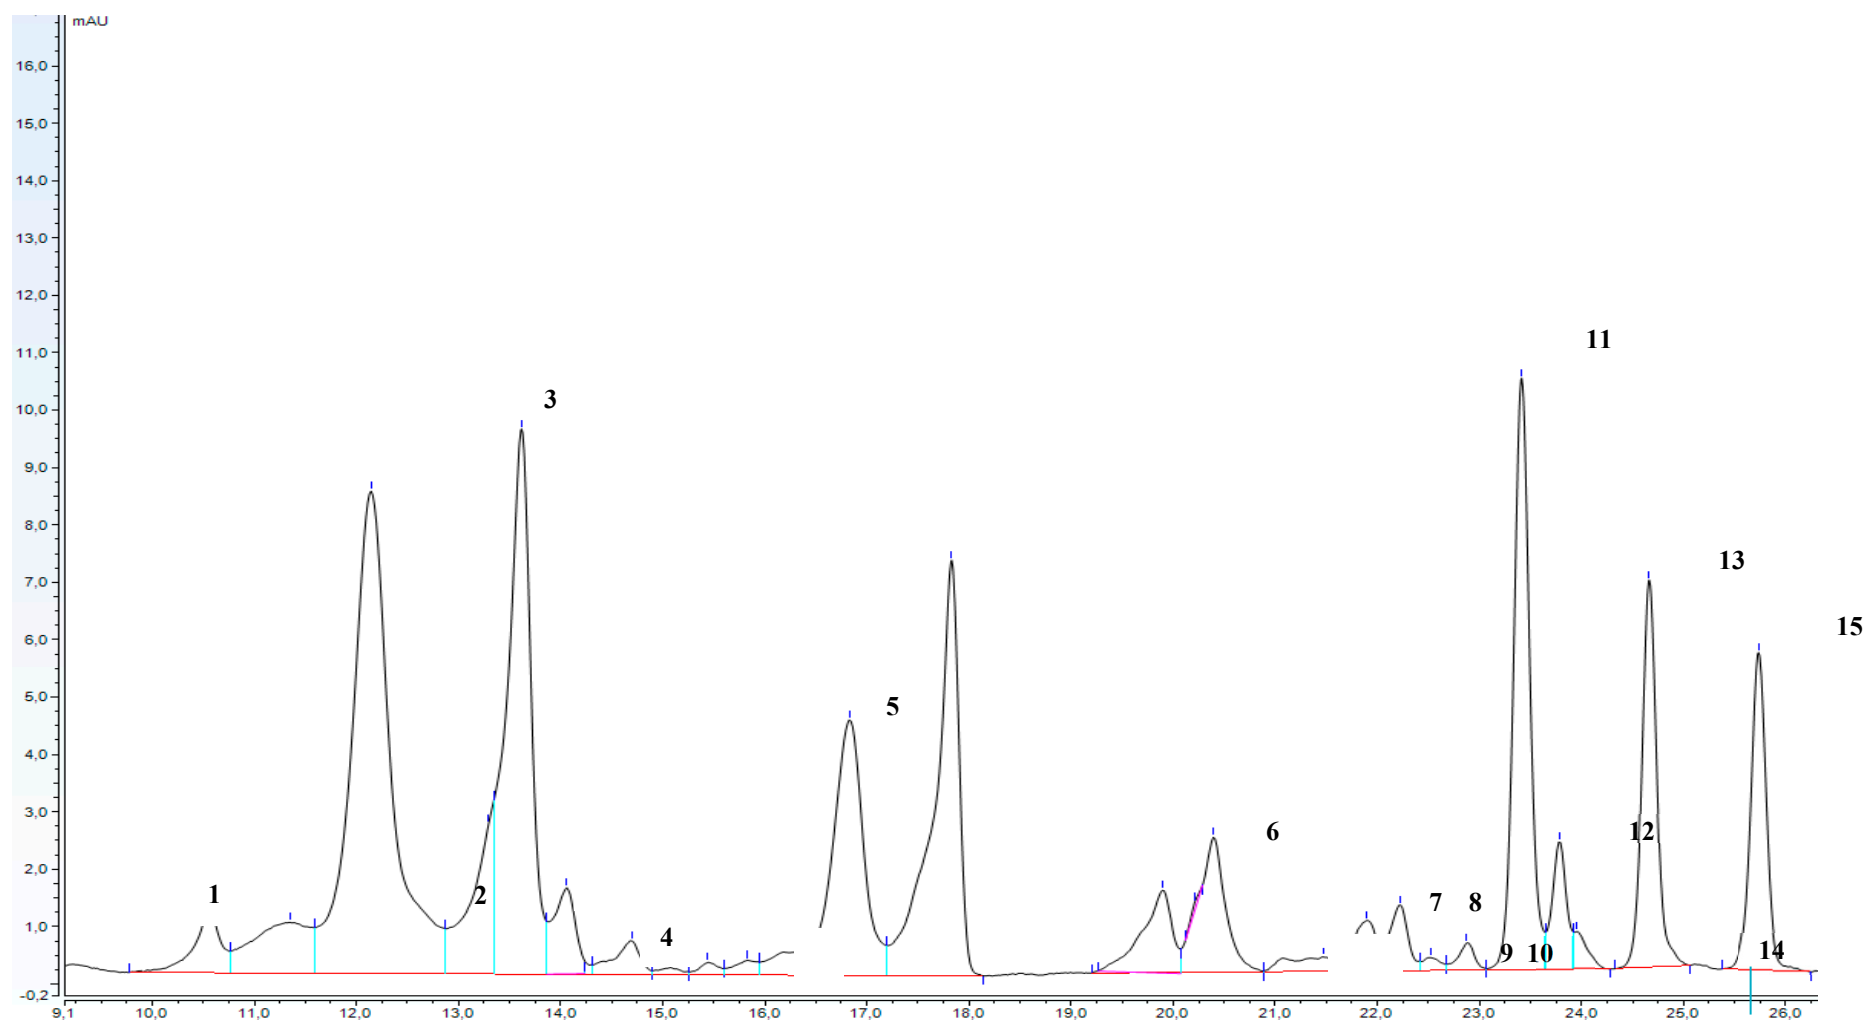

Figure S2: Chromatograph of phenolics at 350 nm wavelength.

Table S2: Individual phenolics identification at 350 nm.

| Peak No. | Phenolic compound                | Rt (min) | [M – H] <sup>–</sup> | MS <sup>2</sup> ( <i>m/z</i> ) | Ref. |
|----------|----------------------------------|----------|----------------------|--------------------------------|------|
| 1        | caffeoylhexose                   | 10.4     | 341                  | 179, 161                       | 2    |
| 2        | catechin                         | 13.1     | 289                  | 245                            | 1    |
| 3        | <i>p</i> -coumaroylhexose        | 13.6     | 325                  | 265, 187, 163, 145             | 2    |
| 4        | apigenin rhamnoside              | 14.7     | 577                  | 357, 311, 293                  | 3    |
| 5        | caffeic acid derivate            | 16.8     | 499                  | 341, 323, 281, 175             | 4    |
| 6        | ellagic acid deoxyhexoside       | 20.2     | 447                  | 301                            | 1    |
| 7        | ellagic acid                     | 21.8     | 301                  | 257, 229, 185                  | 1    |
| 8        | cinnamic acid-3-acetylhexoside   | 22.2     | 351                  | 213, 191, 190, 189, 171        | 5    |
| 9        | kaempferol-3-coumaroyl glucoside | 22.4     | 593                  | 285                            | 1    |
| 10       | quercetin-3- glucuronide         | 22.8     | 477                  | 301                            | 1    |
| 11       | kaempferol-3-glucoside           | 23.3     | 447                  | 285                            | 2    |
| 12       | quercetin-3-malonyl glucoside    | 23.8     | 550                  | 573, 551, 465, 303             | 6    |
| 13       | kaempferol-3-glucuronide         | 24.5     | 461                  | 285                            | 1    |
| 14       | isorhamnetin-3-glucuronide       | 24.8     | 491                  | 315                            | 7    |
| 15       | kaempferol-3-acetyl glucoside    | 25.8     | 489                  | 285                            | 1    |

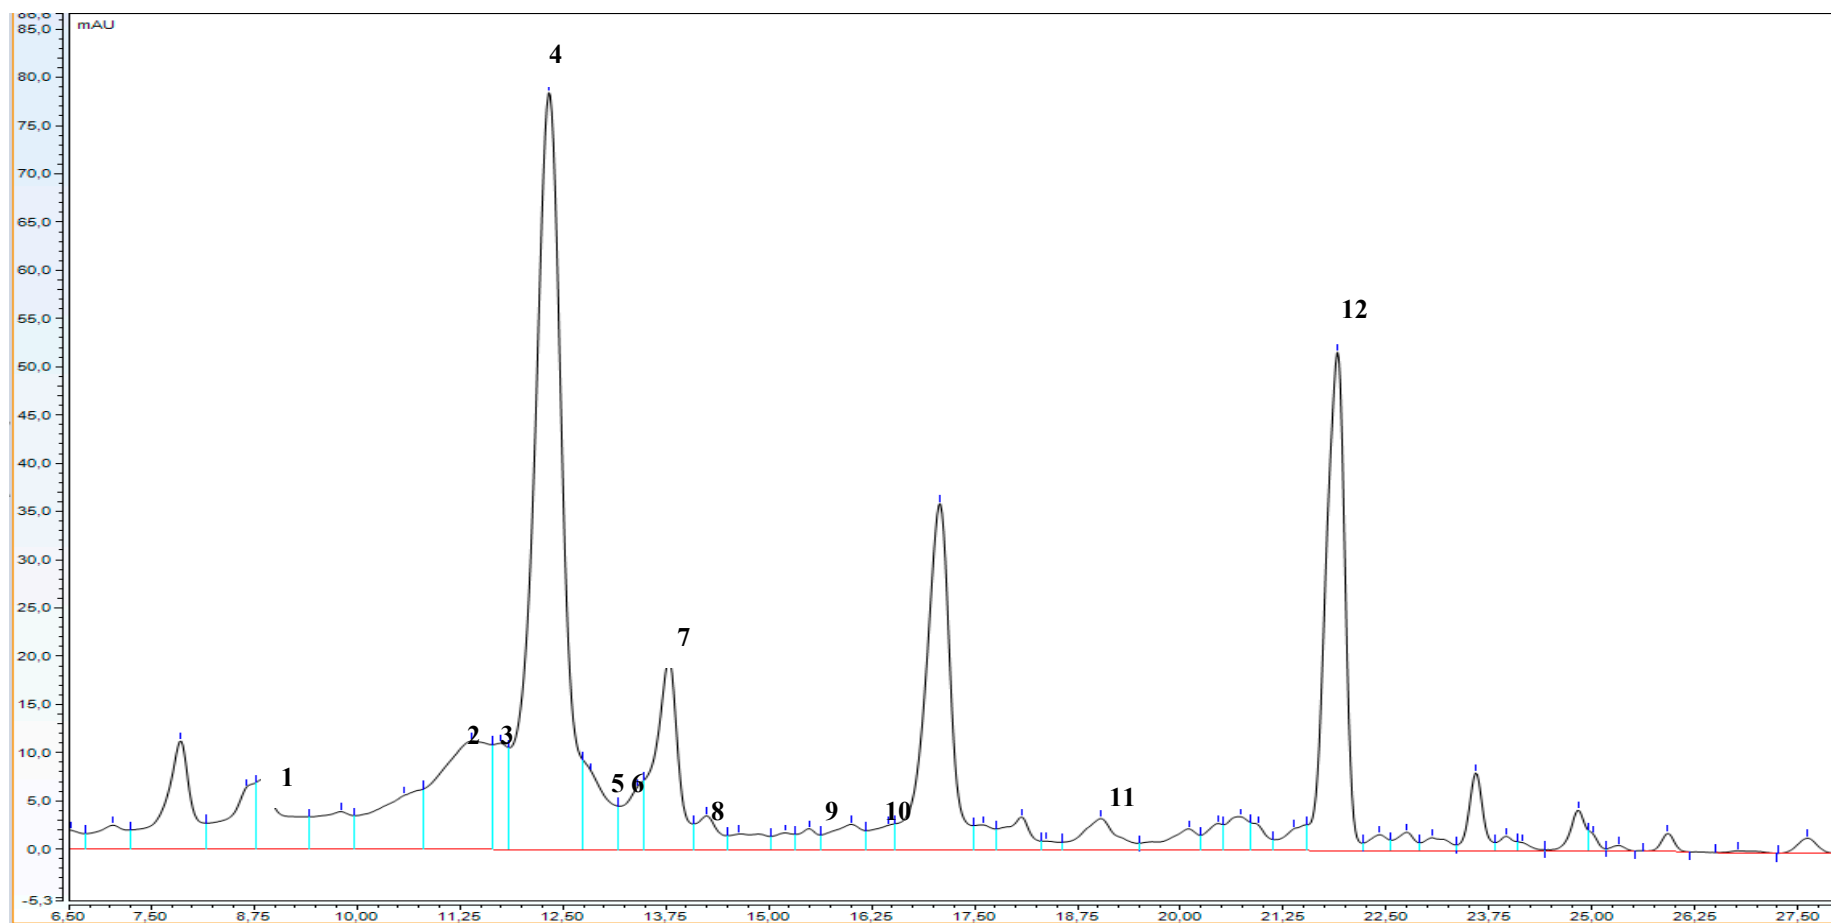

Figure S3: Chromatogram of phenolics at 280 nm wavelength.

Table S3: Individual phenolics identification at 280 nm.

| Peak No. | Phenolic compound              | Rt (min) | [M – H] <sup>–</sup> | MS <sup>2</sup> (m/z)        | Ref. |
|----------|--------------------------------|----------|----------------------|------------------------------|------|
| 1        | bis- HHDP - glucose            | 8.8      | 783                  | 301, 275                     | 4    |
| 2        | bis- HHDP - hexose             | 11.3     | 783                  | 481, 301                     | 1    |
| 3        | procyanidin dimer 1            | 11.4     | 577                  | 425, 407, 289                | 1    |
| 4        | ferulic acid hexose derivate   | 12.0     | 449                  | 431, 355, 329, 287, 269, 193 | 2    |
| 5        | procyanidin dimer 2            | 12.8     | 577                  | 425, 407, 289                | 1    |
| 6        | procyanidin trimer             | 13.0     | 865                  | 577, 425, 407                | 1    |
| 7        | <i>p</i> -coumaroyl hexoside 1 | 13.7     | 609                  | 307                          | 8    |
| 8        | <i>p</i> -coumaroyl hexoside 2 | 13.8     | 609                  | 307                          | 8    |
| 9        | propelargonidin dimer          | 16.1     | 561                  | 425, 409                     | 9    |
| 10       | epicatechin                    | 16.3     | 289                  | 245                          | 1    |
| 11       | <i>p</i> -coumaroyl hexoside 3 | 18.8     | 609                  | 307                          | 8    |
| 12       | cinnamic acid-hexoside         | 21.4     | 355                  | 310, 309, 207, 147           | 3    |

## References

- Weber, N.; Zupanc, V.; Jakopic, J.; Veberic, R.; Mikulic-Petkovsek, M.; Stampar, F. Influence of deficit irrigation on strawberry (*Fragaria × ananassa* Duch.) fruit quality. *J. Sci. Food Agric.* **2017**, *97*, 849–857. <https://doi.org/10.1002/jsfa.7806>.
- Kajdzanoska, M.; Gjamovski, V.; Stefova, M. HPLC-DAD-ESI-MSn identification of phenolic compounds in cultivated strawberry from Macedonia. *Maced. J. Chem. Chem. Eng.* **2010**, *29*, 181–194. <https://doi.org/10.20450/mjcce.2010.165>.
- Hassan, W.H.B.; Abdelaziz, S.; Al Yousef, H.M. Chemical Composition and Biological Activities of the Aqueous Fraction of *Parkinsonia aculeata* L. Growing in Saudi Arabia. *Arab. J. Chem.* **2019**, *12*, 377–387. <https://doi.org/10.1016/j.arabjc.2018.08.003>.
- Medic, A.; Jakopic, J.; Solar, A.; Hudina, M.; Veberic, R. Walnut (*J. regia*) Agro-Residues as a Rich Source of Phenolic Compounds. *Biology* **2021**, *10*, 535.
- Spínola, V.; Pinto, J.; Castilho, P.C. Identification and quantification of phenolic compounds of selected fruits from Madeira Island by HPLC-DAD-ESI-MSn and screening for their antioxidant activity. *Food Chem.* **2015**, *173*, 14–30. <https://doi.org/10.1016/j.foodchem.2014.09.163>.
- Ju, W.-T.; Kwon, O.C.; Kim, H.-B.; Sung, G.-B.; Kim, H.-W.; Kim, Y.-S. Qualitative and quantitative analysis of flavonoids from 12 species of Korean mulberry leaves. *J. Food Sci. Technol.* **2018**, *55*, 1789–1796. <https://doi.org/10.1007/s13197-018-3093-2>.
- Mullen, W.; Boitier, A.; Stewart, A.J.; Crozier, A. Flavonoid metabolites in human plasma and urine after the consumption of red onions: Analysis by liquid chromatography with photodiode array and full scan tandem mass spectrometric detection. *J. Chromatogr. A* **2004**, *1058*, 163–168. <https://doi.org/10.1016/j.chroma.2004.08.117>.
- Panighel, A.; De Rosso, M.; Dalla Vedova, A.; Flamini, R. Putative identification of new *p*-coumaroyl glycoside flavonoids in grape by ultra-high performance liquid chromatography/high-resolution mass spectrometry. *Rapid Commun. Mass Spectrom.* **2015**, *29*, 357–366. <https://doi.org/10.1002/rcm.7115>.
- Enomoto, H.; Takahashi, S.; Takeda, S.; Hatta, H. Distribution of Flavan-3-ol Species in Ripe Strawberry Fruit Revealed by Matrix-Assisted Laser Desorption/Ionization-Mass Spectrometry Imaging. *Molecules* **2020**, *25*, 103.
